# Supplementary material
Source: PubMed Central journal article supplement (PMC3017173)
Supplement: 1017012108_pnas.1017012108_SI.pdf [file 1017012108_pnas.1017012108_SI.pdf]

# Supporting Information

Hsu et al. 10.1073/pnas.1017012108

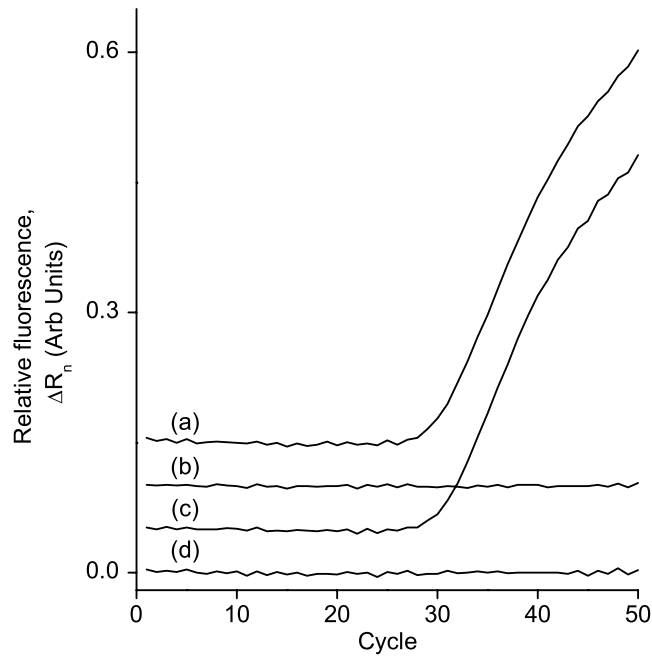

**Fig. S1.** Determination of the efficacy of ribonuclease-catalyzed digestion of RNA and of its subsequent inhibition by means of real-time reverse-transcription PCR. Amplification curves represent (A) influenza viral (WSN strain) RNA, (B) viral RNA subjected to ribonuclease digestion and then inhibition, (C) addition of fresh RNA to the ribonuclease digestion mixture, and (D) RNA-free aqueous solution. For A, B, C, and D the Y-axes are offset for clarity by 0.15, 0.10, 0.05, and 0.00 units, respectively.

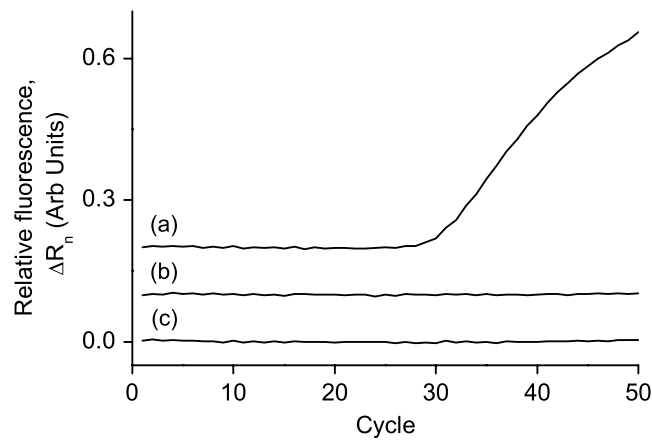

**Fig. S2.** Determination of putative nonspecific amplification of the *N,N*-dodecyl,methyl-PEI coating with real-time reverse-transcription PCR. Amplification curves represent (A) influenza viral (WSN strain) RNA, (B) PBS incubated with polycation-coated polyethylene slides, and (C) RNA-free aqueous solution. For A, B, and C the Y-axes are offset for clarity by 0.2, 0.1, and 0.0 units, respectively.
